# Supplementary material for: The influence of thiolate ligands on the luminescence properties of cycloplatinated(ii) complexes
Source: Royal Society of Chemistry journal article supplement (doi:10.1039/c7dt03599c), 2017-01-01
Supplement: c7dt03599c1.pdf [file c7dt03599c1.pdf]

## Electronic Supplementary Information

### Influence of Thiolate ligands on Luminescent Properties of Cycloplatinated(II) Complexes

Mahboubeh Jamshidi,<sup>a</sup> Mojgan Babaghasabha,<sup>b</sup> Hamid R. Shahsavari,<sup>b\*</sup> and S. Masoud Nabavizadeh,<sup>a\*</sup>

<sup>a</sup>*Department of Chemistry, College of Sciences, Shiraz University, Shiraz 71454, Iran.*

<sup>b</sup>*Department of Chemistry, Institute for Advanced Studies in Basic Sciences (IASBS), Yousef Sobouti Blvd., Zanjan 45137-66731, Iran.*

\*Email: shahsavari@iasbs.ac.ir. (H.R.S.); nabavizadeh@shirazu.ac.ir. (S.M.N)

| Contents:                                                                                                                                                                                                                                                                                                                       | Page |
|---------------------------------------------------------------------------------------------------------------------------------------------------------------------------------------------------------------------------------------------------------------------------------------------------------------------------------|------|
| <b>Figure S1.</b> $^1\text{H}$ NMR spectrum of <b>1a</b> in $\text{dms}\text{-}d_6$ at room temperature.                                                                                                                                                                                                                        | S3   |
| <b>Figure S2.</b> $^{31}\text{P}\{^1\text{H}\}$ NMR spectrum of <b>1a</b> in $\text{dms}\text{-}d_6$ at room temperature.                                                                                                                                                                                                       | S3   |
| <b>Figure S3.</b> $^1\text{H}$ NMR spectrum of <b>2a</b> in $\text{dms}\text{-}d_6$ at room temperature.                                                                                                                                                                                                                        | S4   |
| <b>Figure S4.</b> $^{31}\text{P}\{^1\text{H}\}$ NMR spectrum of <b>2a</b> in $\text{dms}\text{-}d_6$ at room temperature.                                                                                                                                                                                                       | S4   |
| <b>Figure S5.</b> $^1\text{H}$ NMR spectrum of <b>3a</b> in $\text{dms}\text{-}d_6$ at room temperature.                                                                                                                                                                                                                        | S5   |
| <b>Figure S6.</b> $^{31}\text{P}\{^1\text{H}\}$ NMR spectrum of <b>3a</b> in $\text{dms}\text{-}d_6$ at room temperature.                                                                                                                                                                                                       | S5   |
| <b>Figure S7.</b> $^1\text{H}$ NMR spectrum of <b>3b</b> in $\text{dms}\text{-}d_6$ at room temperature.                                                                                                                                                                                                                        | S6   |
| <b>Figure S8.</b> $^{31}\text{P}\{^1\text{H}\}$ NMR spectrum of <b>3b</b> in $\text{dms}\text{-}d_6$ at room temperature.                                                                                                                                                                                                       | S6   |
| <b>Table S1.</b> Crystallographic and structure refinement data for <b>1a</b> and <b>2a</b> .                                                                                                                                                                                                                                   | S7   |
| <b>Table S2.</b> Selected Distances [Å] and Angles [°] for <b>1a</b> , <b>2a</b> and <b>1b</b> .                                                                                                                                                                                                                                | S8   |
| <b>Figure S9.</b> Aromatic ring including the $\kappa^1\text{-S-SR}$ moiety is approximately perpendicular to the metal plane. The dihedral angle between the metal plane and the aryl ring is $82.88^\circ$ for <b>1a</b> and $63.24^\circ$ for <b>2a</b> .                                                                    | S8   |
| <b>Figure 10.</b> Crystal packing of complexes (a) <b>1a</b> and (b) <b>2a</b> are displaying the intermolecular and intramolecular contacts. The supramolecular packing is formed by dimers supported by intermolecular $\pi \cdots \pi$ interactions involving two bzq ligands. Hydrogen atoms have been omitted for clarity. | S9   |
| <b>Table S3.</b> Absorption data for <b>A</b> , <b>B</b> , <b>1-3</b> and some ligands in $\text{CH}_2\text{Cl}_2$ solutions and solid state at ambient temperature.                                                                                                                                                            | S10  |
| <b>Figure S11.</b> UV-vis spectra of <b>1a</b> and <b>1b</b> in $\text{CH}_2\text{Cl}_2$ at 298 K.                                                                                                                                                                                                                              | S11  |
| <b>Figure S12.</b> Absorption spectra of (a) <b>A</b> , <b>1a</b> , <b>2a</b> and <b>3a</b> ; (b) <b>B</b> , <b>1b</b> , <b>2b</b> and <b>3b</b> in solid state at 298 K.                                                                                                                                                       | S12  |
| <b>Table S4.</b> Selected low-lying singlet and triplet excited states computed by TD-DFT with the orbitals involved and vertical excitation energies (nm) for <b>1-3</b> .                                                                                                                                                     | S13  |
| <b>Table S5.</b> Composition (%) of frontier MOs in the ground state ( $S_0$ ) for complexes <b>1-3</b> in gas phase.                                                                                                                                                                                                           | S14  |
| <b>Figure S13.</b> DFT optimized $S_0$ (left) and $T_1$ (right) geometries of complex <b>3b</b> with corresponding contribution of different fragments in frontier molecular orbitals obtained in $S_0$ and $T_1$ states.                                                                                                       | S15  |
| <b>Figure S14.</b> Emission spectra of (a) <b>1a</b> and (b) <b>1b</b> in solid, PMMA and PS films at 298 K.                                                                                                                                                                                                                    | S16  |

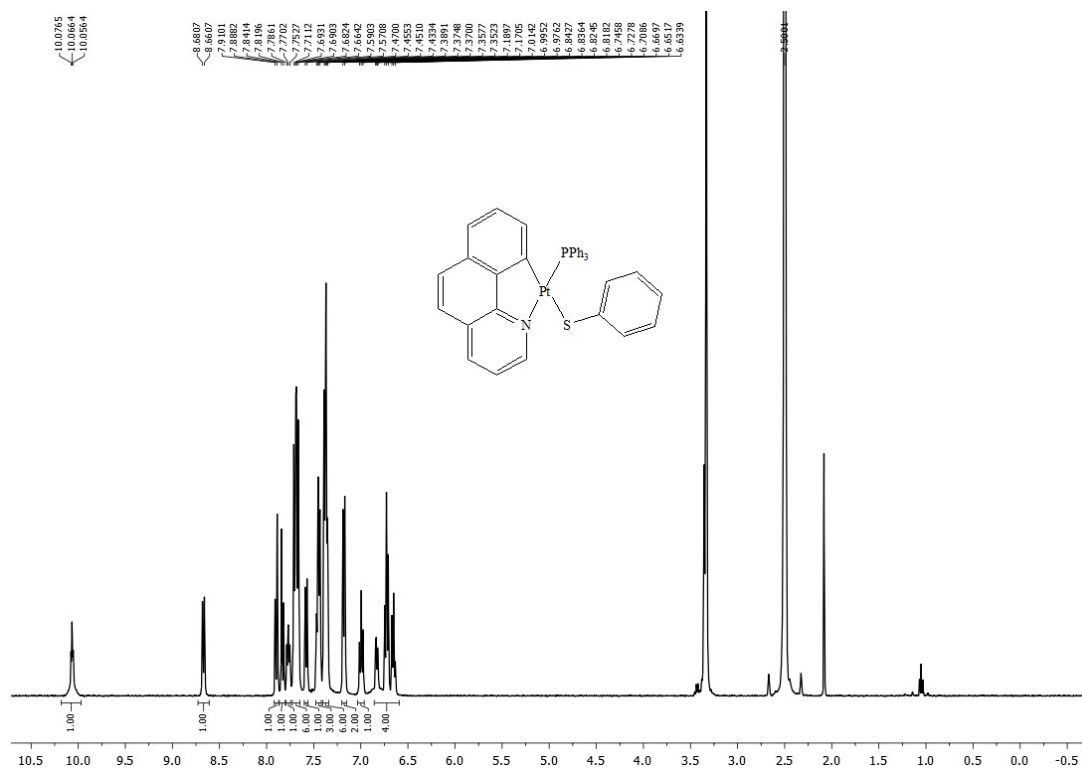

**Figure S1.** <sup>1</sup>H NMR spectrum of **1a** in dms0-d<sub>6</sub> at room temperature.

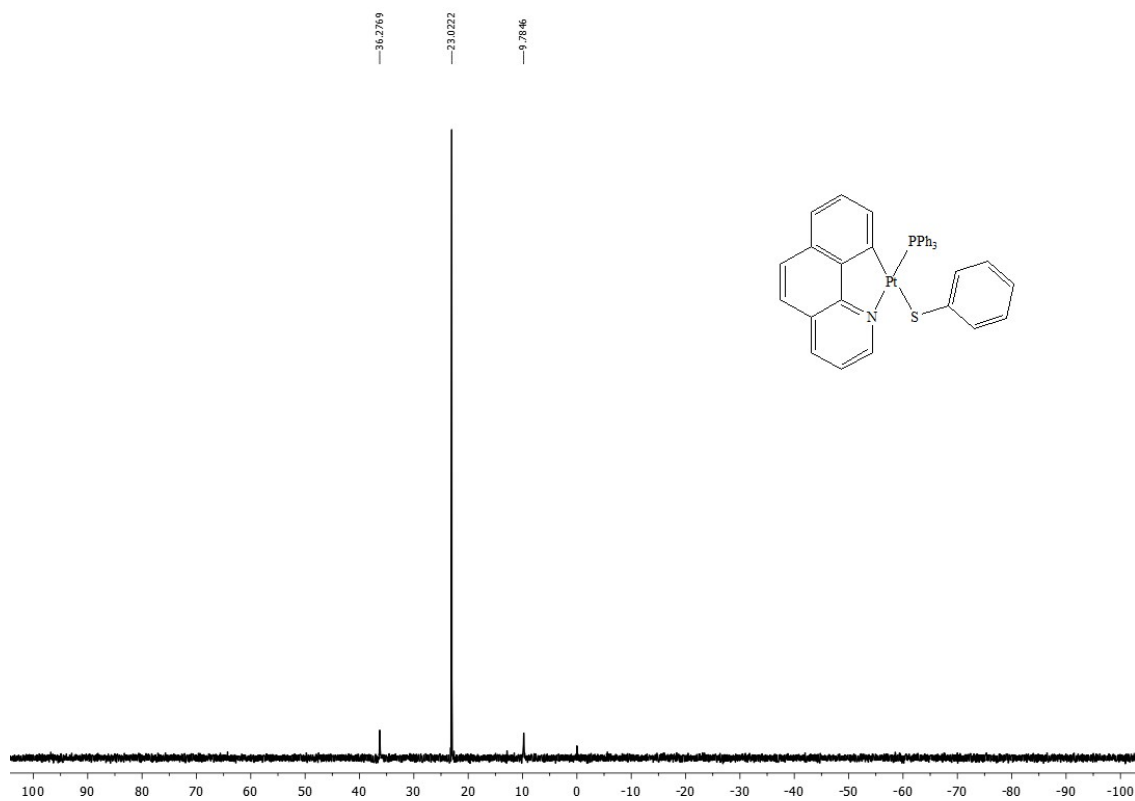

**Figure S2.** <sup>31</sup>P{<sup>1</sup>H} NMR spectrum of **1a** in dms0-d<sub>6</sub> at room temperature.

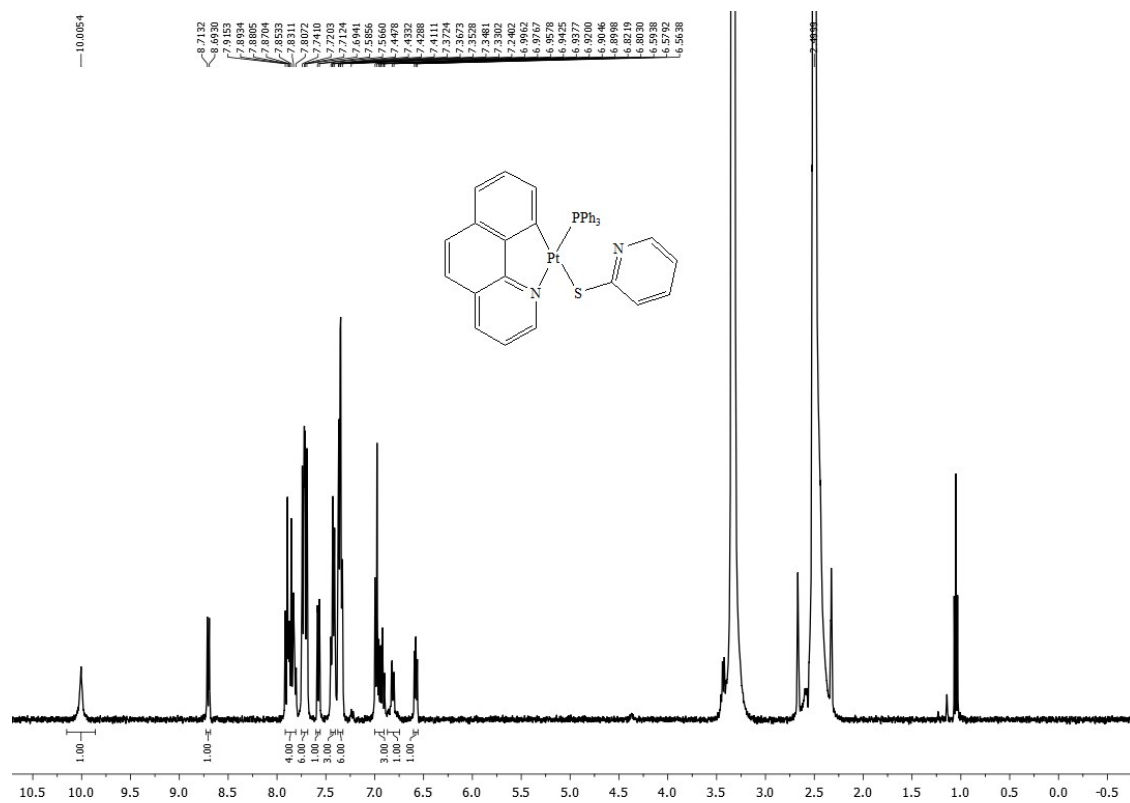

**Figure S3.** <sup>1</sup>H NMR spectrum of **2a** in dms0-d<sub>6</sub> at room temperature.

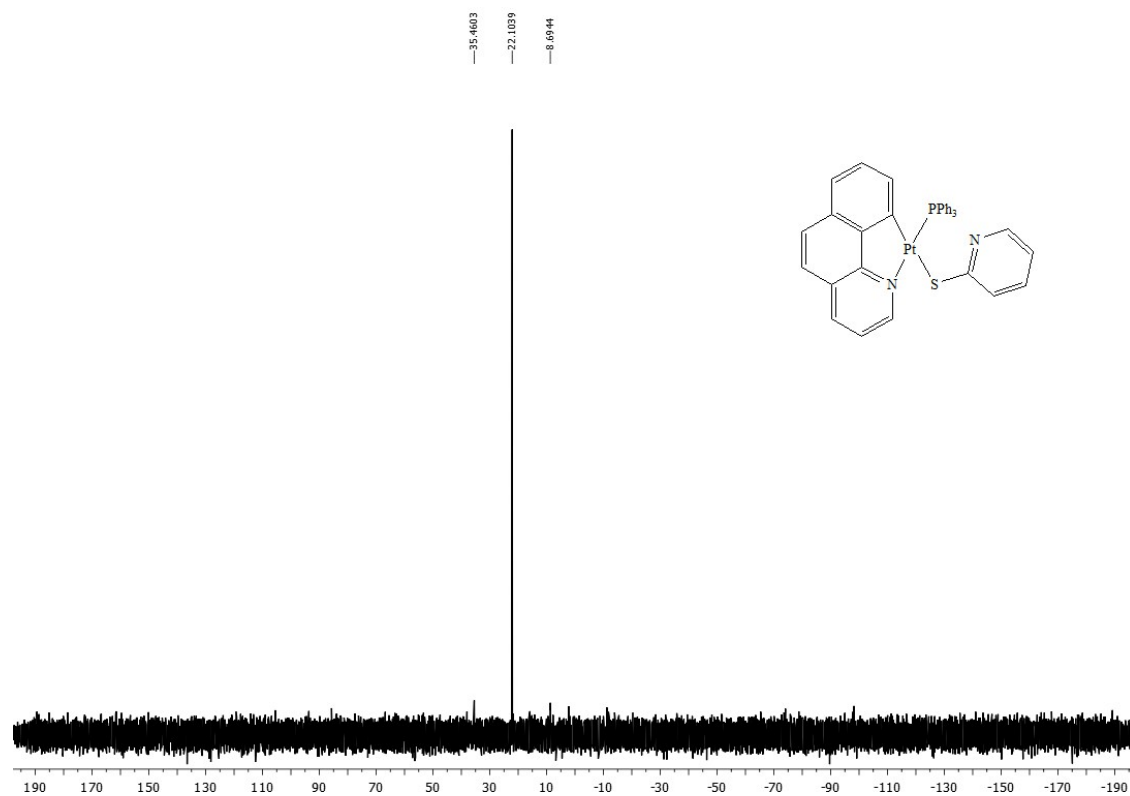

**Figure S4.** <sup>31</sup>P{<sup>1</sup>H} NMR spectrum of **2a** in dms0-d<sub>6</sub> at room temperature.

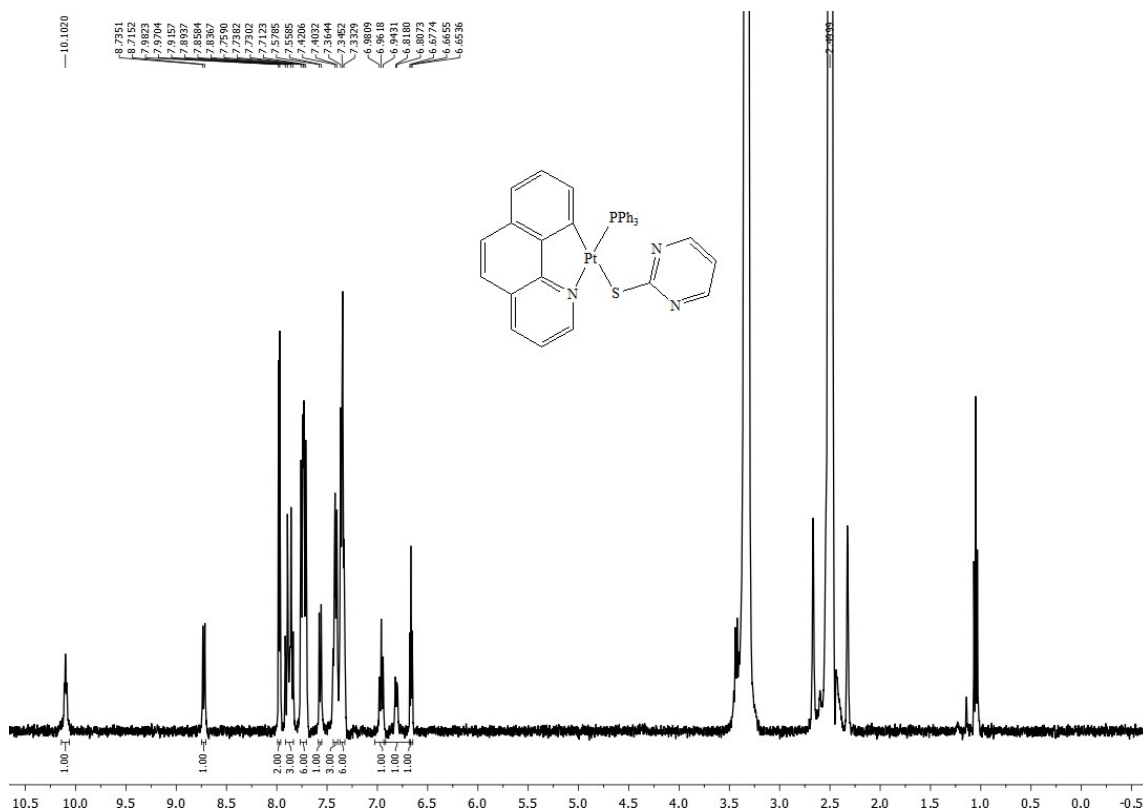

**Figure S5.**  $^1\text{H}$  NMR spectrum of **3a** in  $\text{dms0-d}_6$  at room temperature.

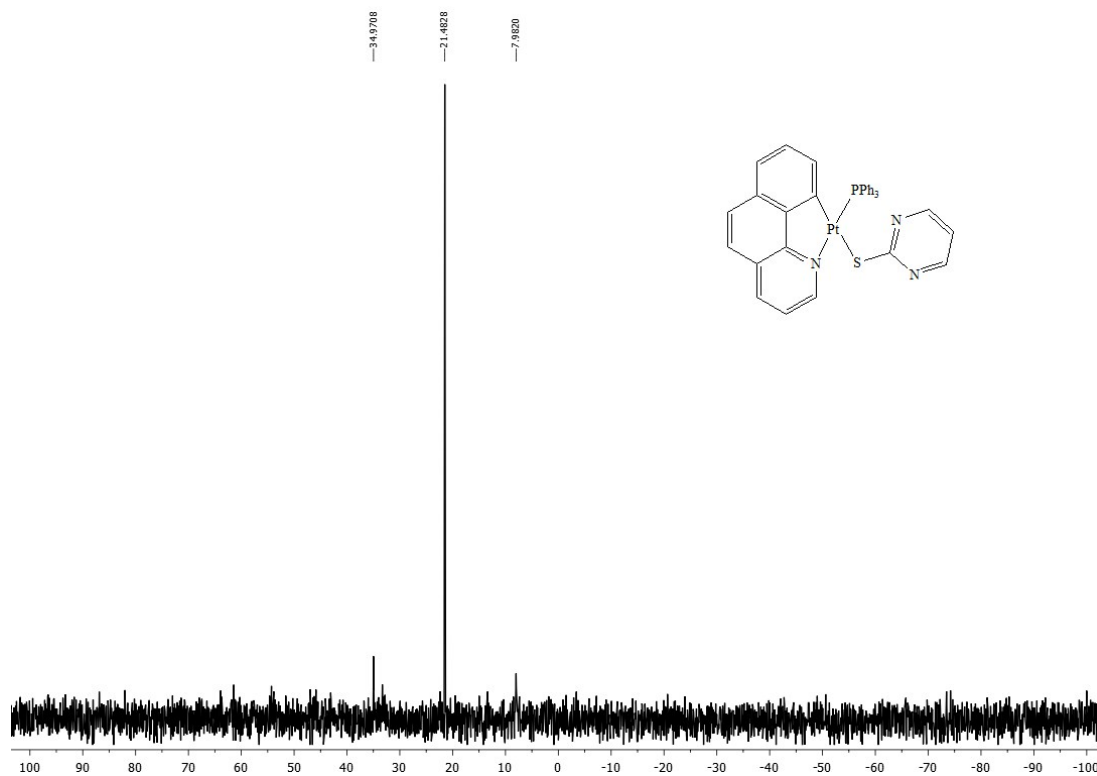

**Figure S6.**  $^{31}\text{P}\{^1\text{H}\}$  NMR spectrum of **3a** in  $\text{dms0-d}_6$  at room temperature.

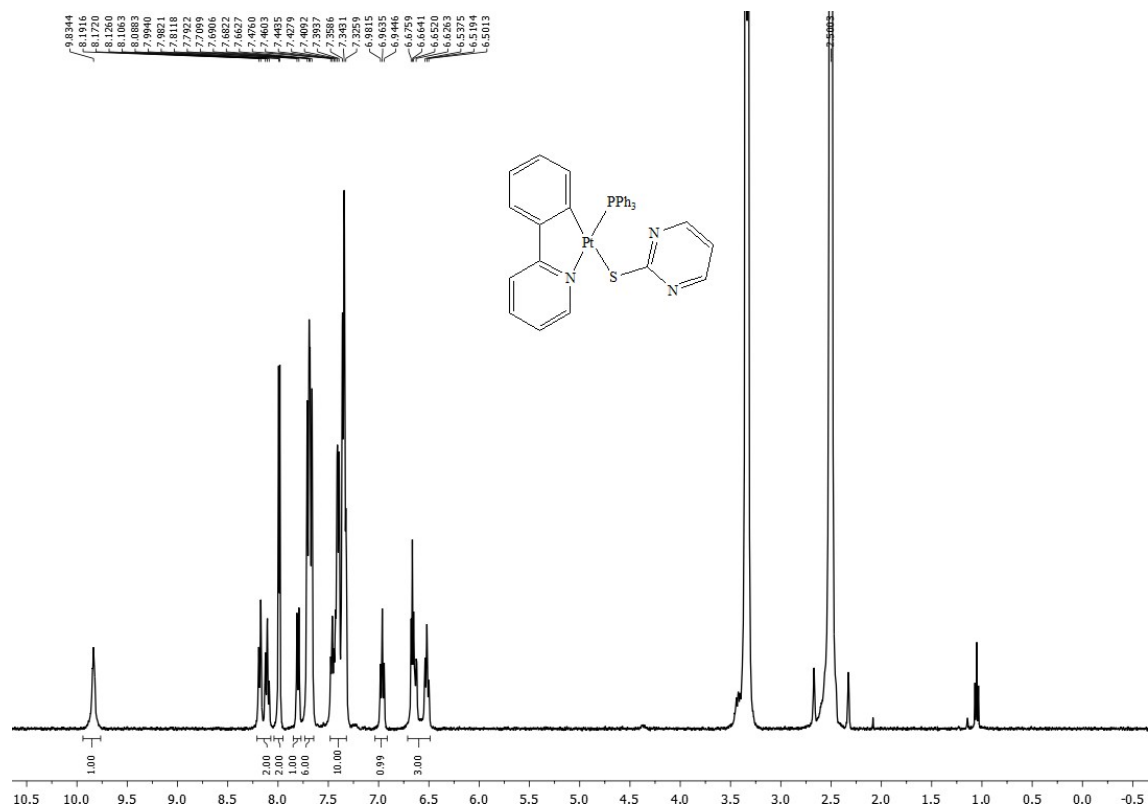

**Figure S7.**  $^1\text{H}$  NMR spectrum of **3b** in  $\text{dms0-d}_6$  at room temperature.

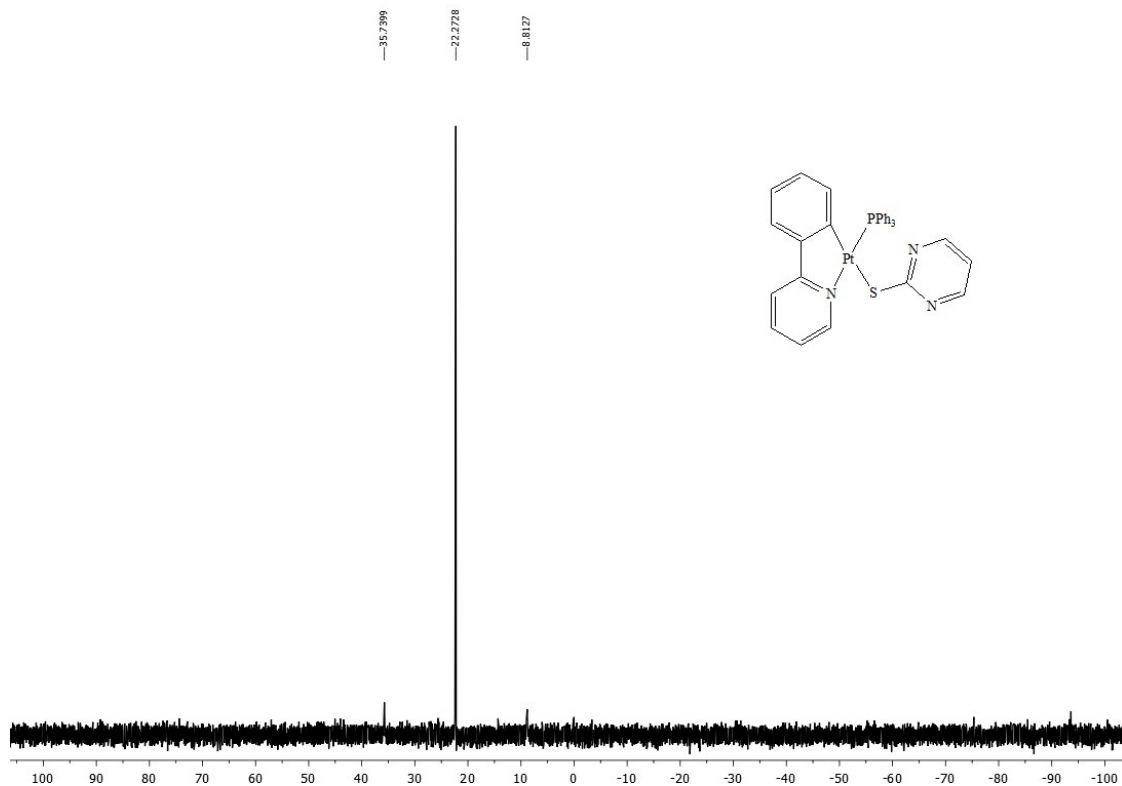

**Figure S8.**  $^{31}\text{P}\{^1\text{H}\}$  NMR spectrum of **3b** in  $\text{dms0-d}_6$  at room temperature.

**Table S1.** Crystallographic and structure refinement data for **1a** and **2a**.

| <b>Compound</b>                                | <b>1a</b>                                            | <b>2a</b>                                          |
|------------------------------------------------|------------------------------------------------------|----------------------------------------------------|
| Formula                                        | C <sub>38</sub> H <sub>30</sub> Cl <sub>2</sub> NPtS | C <sub>36</sub> H <sub>27</sub> N <sub>2</sub> PtS |
| <i>D</i> <sub>calc.</sub> / g cm <sup>-3</sup> | 1.711                                                | 1.713                                              |
| <i>m</i> /mm <sup>-1</sup>                     | 10.973                                               | 10.491                                             |
| Formula Weight                                 | 829.65                                               | 745.71                                             |
| Color                                          | yellow                                               | clear yellow                                       |
| Shape                                          | prism                                                | prism                                              |
| <i>T</i> /K                                    | 294.60(10)                                           | 123.01(10)                                         |
| Crystal System                                 | triclinic                                            | monoclinic                                         |
| Space Group                                    | P-1                                                  | P2 <sub>1</sub> /n                                 |
| <i>a</i> /Å                                    | 10.0395(2)                                           | 19.6231(3)                                         |
| <i>b</i> /Å                                    | 10.9690(2)                                           | 8.23150(10)                                        |
| <i>c</i> /Å                                    | 15.0116(3)                                           | 20.0833(3)                                         |
| <i>a</i> <sup>°</sup>                          | 85.1370(10)                                          | 90                                                 |
| <i>b</i> <sup>°</sup>                          | 85.669(2)                                            | 116.938(2)                                         |
| <i>g</i> <sup>°</sup>                          | 78.299(2)                                            | 90                                                 |
| <i>V</i> /Å <sup>3</sup>                       | 1610.06(6)                                           | 2892.02(8)                                         |
| <i>Z</i>                                       | 2                                                    | 4                                                  |
| <i>Z</i> '                                     | 1                                                    | 1                                                  |
| Wavelength/Å                                   | 1.54184                                              | 1.54184                                            |
| Radiation type                                 | CuK <sub>α</sub>                                     | CuK <sub>α</sub>                                   |
| <i>Q</i> <sub>min</sub> <sup>°</sup>           | 4.126                                                | 4.259                                              |
| <i>Q</i> <sub>max</sub> <sup>°</sup>           | 73.664                                               | 73.689                                             |
| Measured Refl.                                 | 34429                                                | 60590                                              |
| Independent Refl.                              | 6395                                                 | 5804                                               |
| Reflections Used                               | 6270                                                 | 5460                                               |
| <i>R</i> <sub>int</sub>                        | 0.0503                                               | 0.0426                                             |
| Parameters                                     | 397                                                  | 370                                                |
| Restraints                                     | 0                                                    | 0                                                  |
| Largest Peak                                   | 0.602                                                | 1.242                                              |
| Deepest Hole                                   | -0.980                                               | -0.899                                             |
| GooF                                           | 1.057                                                | 1.063                                              |
| <i>wR</i> <sub>2</sub> (all data)              | 0.0452                                               | 0.0442                                             |
| <i>wR</i> <sub>2</sub>                         | 0.0449                                               | 0.0433                                             |
| <i>R</i> <sub>1</sub> (all data)               | 0.0192                                               | 0.0203                                             |
| <i>R</i> <sub>1</sub>                          | 0.0187                                               | 0.0183                                             |
| CCDC No.                                       | 1547213                                              | 1547214                                            |

**Table S2.** Selected Distances [Å] and Angles [°] for **1a**, **2a** and **1b**.

|               | <b>1a</b>  | <b>2a</b>  | <b>1b</b> |
|---------------|------------|------------|-----------|
| Pt-S(1)       | 2.3689(6)  | 2.3651(6)  | 2.361(3)  |
| Pt-N(1)       | 2.0951(19) | 2.1073(19) | 2.073(9)  |
| Pt-C(1)       | 2.043(2)   | 2.048(2)   | 2.065(12) |
| Pt-P(1)       | 2.2285(6)  | 2.2228(6)  | 2.244(3)  |
|               |            |            |           |
| C(1)-Pt-N(1)  | 80.84(9)   | 80.76(9)   | 81.9(4)   |
| N(1)-Pt-S(1)  | 91.88(6)   | 90.63(6)   | 90.2(3)   |
| S(1)-Pt-P(1)  | 93.00(2)   | 93.85(2)   | 90.95(11) |
| P(1)-Pt-C(1)  | 94.34(7)   | 94.75(7)   | 97.2(3)   |
| Pt-S(1)-C(14) | 107.58(8)  | 109.51(8)  | 107.1(5)  |

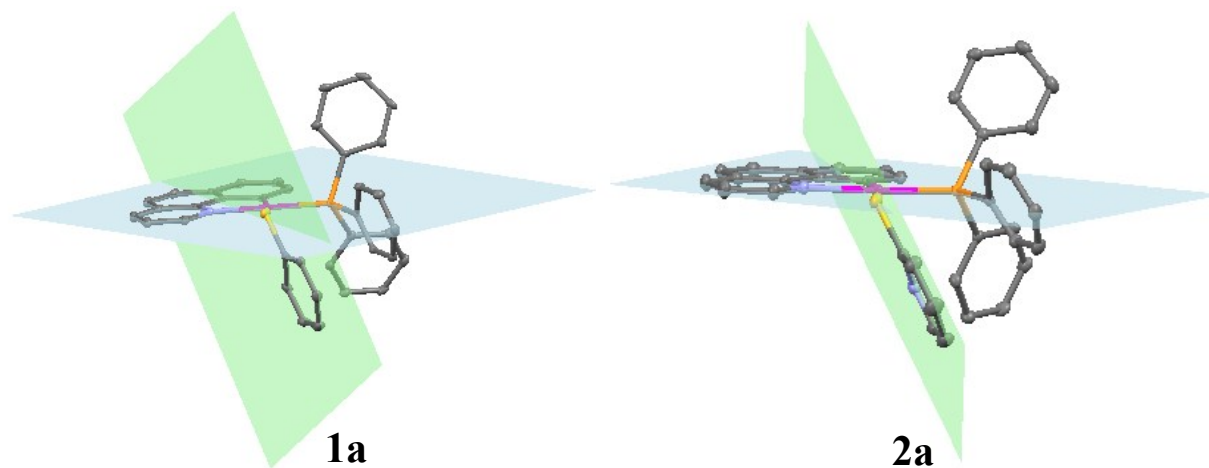

**Figure S9.** Aromatic ring including the  $\kappa^1$ -S-SR moiety is approximately perpendicular to the metal plane. The dihedral angle between the metal plane and the aryl ring is 82.88° for **1a** and 63.24° for **2a**.



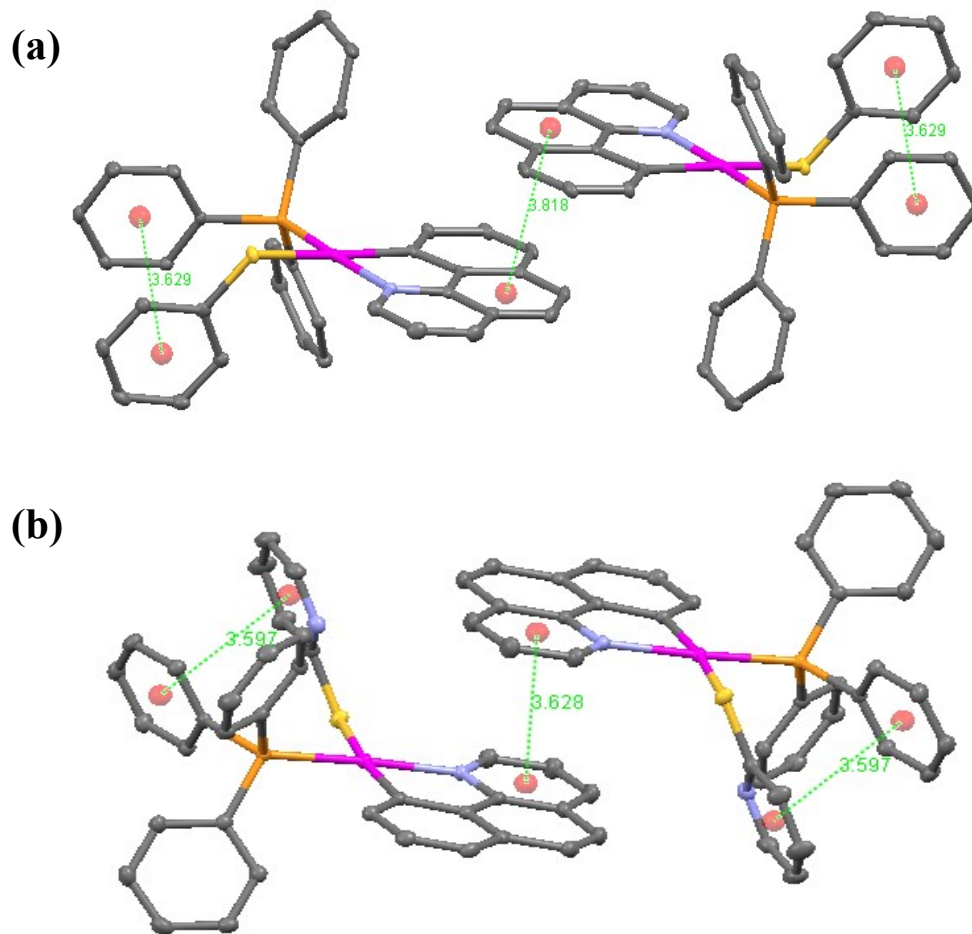

**Figure 10.** Crystal packing of complexes (a) **1a** and (b) **2a** showing the intermolecular and intramolecular contacts. The supramolecular packing is formed by dimers supported by intermolecular  $\pi \cdots \pi$  interactions involving two bzq ligands. Hydrogen atoms are omitted for clarity.

**Table S3.** Absorption data for **A**, **B**, **1-3** and some ligands in CH<sub>2</sub>Cl<sub>2</sub> solutions and solid state at ambient temperature.

| <b>Compound</b>                       | <b>media</b>                                           | <b><math>\lambda_{\text{abs}}/\text{nm}</math> (<math>\epsilon / 10^{-4} \text{ M}^{-1} \text{ cm}^{-1}</math>)</b> |
|---------------------------------------|--------------------------------------------------------|---------------------------------------------------------------------------------------------------------------------|
| Free bzqH                             | CH <sub>2</sub> Cl <sub>2</sub> (10 <sup>-3</sup> M)   | 296(4.49), 330(4.31), 345(4.37)                                                                                     |
| Free Na <sup>+</sup> Spy <sup>-</sup> | CH <sub>2</sub> Cl <sub>2</sub> (2×10 <sup>-5</sup> M) | 282(4.21), 359(3.80)                                                                                                |
| Free SpyH                             | CH <sub>2</sub> Cl <sub>2</sub> (2×10 <sup>-5</sup> M) | 292(4.16), 375(3.73)                                                                                                |
| <b>A</b>                              | CH <sub>2</sub> Cl <sub>2</sub> (5×10 <sup>-5</sup> M) | 235(4.59), 261(4.52), 305(4.16), 328(3.78),<br>340(3.53), 394(3.25),416(3.53)                                       |
|                                       | Solid                                                  | 229, 265, 315, 401, 418, 468, 593                                                                                   |
| <b>B</b>                              | CH <sub>2</sub> Cl <sub>2</sub> (5×10 <sup>-5</sup> M) | 232(4.46), 287(4.26), 315(3.71), 327(3.55),<br>328(3.28)                                                            |
|                                       | Solid                                                  | 230, 268, 289, 320, 382, 445, 478                                                                                   |
| <b>1a</b>                             | CH <sub>2</sub> Cl <sub>2</sub> (5×10 <sup>-5</sup> M) | 244(4.70), 276(4.34), 287(4.35), 346(3.74),<br>374(3.59), 399(3.39), 450(2.89)                                      |
|                                       | Solid                                                  | 240, 268, 310, 410, 474, 621                                                                                        |
| <b>1b</b>                             | CH <sub>2</sub> Cl <sub>2</sub> (5×10 <sup>-5</sup> M) | 231(4.83), 277(4.45), 326(3.97), 364(3.53),<br>438(3.11)                                                            |
|                                       | Solid                                                  | 209, 234, 270, 325, 370, 463, 502                                                                                   |
| <b>2a</b>                             | CH <sub>2</sub> Cl <sub>2</sub> (5×10 <sup>-5</sup> M) | 241(4.69), 287(4.34), 348(3.86), 397(3.42),<br>432(3.15)                                                            |
|                                       | Solid                                                  | 234, 298, 370, 448, 535, 635                                                                                        |
| <b>2b</b>                             | CH <sub>2</sub> Cl <sub>2</sub> (5×10 <sup>-5</sup> M) | 284(4.00), 326(3.94), 386(3.40), 417(3.18)                                                                          |
|                                       | Solid                                                  | 205, 232, 271, 357, 451, 532                                                                                        |
| <b>3a</b>                             | CH <sub>2</sub> Cl <sub>2</sub> (5×10 <sup>-5</sup> M) | 234(4.79), 288(4.37), 347(3.79), 413(3.33)                                                                          |
|                                       | Solid                                                  | 232, 295, 345, 382, 420, 418, 633                                                                                   |
| <b>3b</b>                             | CH <sub>2</sub> Cl <sub>2</sub> (5×10 <sup>-5</sup> M) | 237(4.46), 274(4.52), 329(4.04), 392(3.34)                                                                          |
|                                       | Solid                                                  | 229, 273, 330, 375, 443                                                                                             |

<sup>a</sup>Data at high concentration (10<sup>-3</sup> M) are similar to those at low concentration.

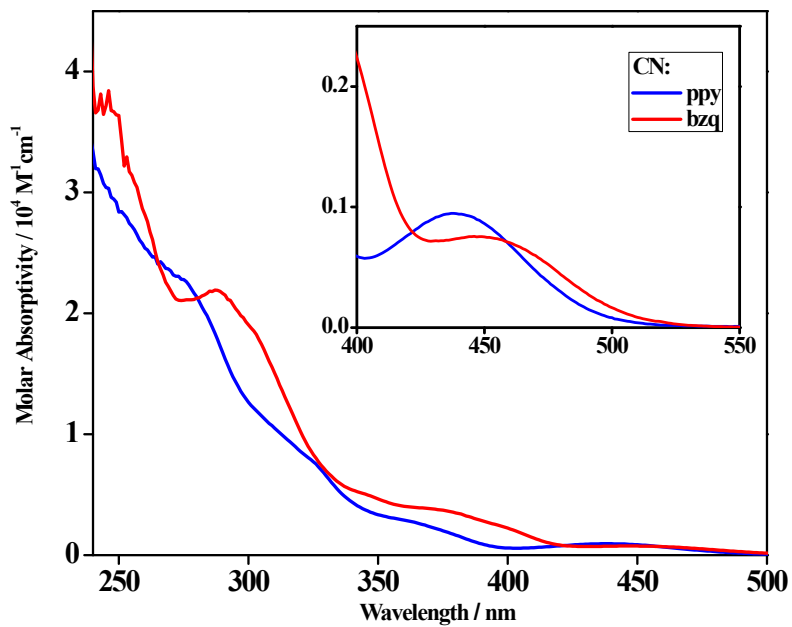

**Figure S11.** UV-vis spectra of **1a** and **1b** in CH<sub>2</sub>Cl<sub>2</sub> at 298 K (the insets show the expansion of the region of the low-energy bands).

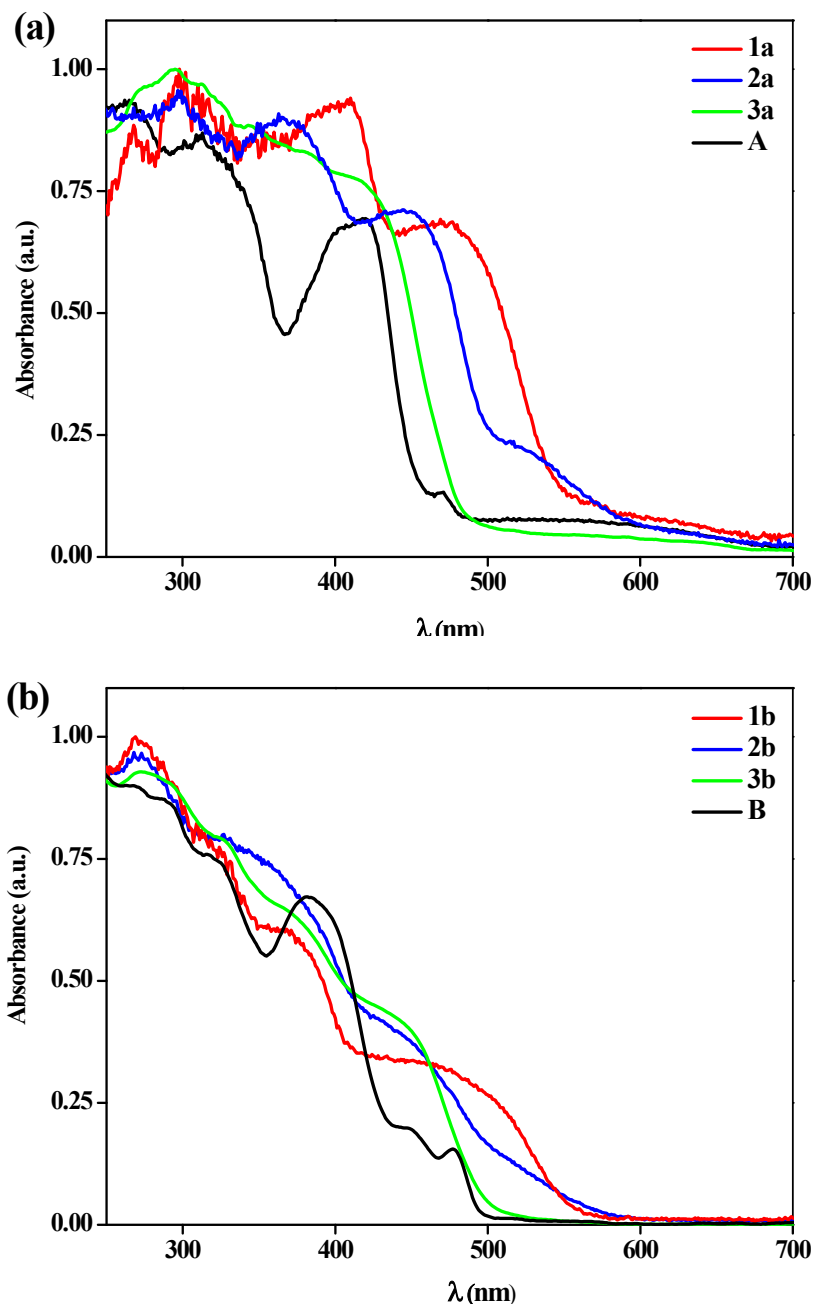

**Figure S12.** Absorption spectra of (a) **A**, **1a**, **2a** and **3a**; (b) **B**, **1b**, **2b** and **3b** in solid state at 298 K.

**Table S4.** Selected low-lying singlet and triplet excited states computed by TD-DFT with the orbitals involved and vertical excitation energies (nm) for **1-3**.

|           | State          | $\lambda_{\text{exc}}$ (calc.)/nm | $f$   | Main Transition (Percentage Contribution) |
|-----------|----------------|-----------------------------------|-------|-------------------------------------------|
| <b>1a</b> | T <sub>1</sub> | 621                               |       | HOMO→LUMO (98)                            |
|           | S <sub>1</sub> | 572                               | 0.003 | HOMO→LUMO (98)                            |
|           | S <sub>2</sub> | 441                               | 0.003 | HOMO→LUMO+1 (95)                          |
|           | S <sub>3</sub> | 429                               | 0.013 | HOMO→LUMO+3 (77)                          |
| <b>2a</b> | T <sub>1</sub> | 540                               |       | HOMO→LUMO (98)                            |
|           | S <sub>1</sub> | 514                               | 0.002 | HOMO→LUMO (98)                            |
|           | S <sub>2</sub> | 405                               | 0.003 | HOMO→LUMO+1 (95)                          |
|           | S <sub>3</sub> | 394                               | 0.004 | HOMO→LUMO+3 (84)                          |
|           | S <sub>4</sub> | 388                               | 0.043 | HOMO-1→LUMO (92)                          |
| <b>3a</b> | T <sub>1</sub> | 480                               |       | HOMO→LUMO (90)                            |
|           | S <sub>1</sub> | 474                               | 0.002 | HOMO→LUMO (98)                            |
|           | S <sub>2</sub> | 378                               | 0.038 | HOMO-1→LUMO (92)                          |
|           | S <sub>3</sub> | 379                               | 0.004 | HOMO→LUMO (90)                            |
| <b>1b</b> | T <sub>1</sub> | 607                               |       | HOMO→LUMO (98)                            |
|           | S <sub>1</sub> | 522                               | 0.005 | HOMO→LUMO (98)                            |
|           | S <sub>2</sub> | 433                               | 0.007 | HOMO→LUMO+3 (70)                          |
|           | S <sub>3</sub> | 419                               | 0.002 | HOMO→LUMO+2 (52)<br>HOMO→LUMO+1 (26)      |
| <b>2b</b> | T <sub>1</sub> |                                   |       | HOMO→LUMO (98)                            |
|           | S <sub>1</sub> | 523                               | 0.003 | HOMO→LUMO (98)                            |
|           | S <sub>2</sub> | 414                               | 0.004 | HOMO→LUMO+3 (72)                          |
|           | S <sub>3</sub> | 401                               | 0.002 | HOMO→LUMO+2 (44)<br>HOMO→LUMO+1 (32)      |
| <b>3b</b> | T <sub>1</sub> |                                   |       | HOMO→LUMO (77)                            |
|           | S <sub>1</sub> | 454                               | 0.003 | HOMO→LUMO (98)                            |
|           | S <sub>2</sub> | 372                               | 0.000 | HOMO→LUMO+3 (70)                          |
|           | S <sub>3</sub> | 369                               | 0.046 | HOMO-1→LUMO (82)                          |

**Table S5.** Composition (%) of frontier MOs in the ground state ( $S_0$ ) for complexes **1-3** in gas phase.

|           | E (eV) | Pt | bzq | SR | PPh <sub>3</sub> |
|-----------|--------|----|-----|----|------------------|
| <b>1a</b> |        |    |     |    |                  |
| L+3       | -0.781 | 26 | 11  | 6  | 57               |
| L+2       | -0.885 | 9  | 5   | 0  | 87               |
| L+1       | -1.081 | 3  | 88  | 3  | 5                |
| LUMO      | -1.673 | 3  | 93  | 1  | 4                |
| HOMO      | -4.452 | 8  | 8   | 81 | 3                |
| H-1       | -5.465 | 23 | 43  | 32 | 2                |
| H-2       | -5.689 | 13 | 48  | 37 | 3                |
| H-3       | -6.022 | 55 | 4   | 36 | 5                |
| <b>2a</b> |        |    |     |    |                  |
| L+3       | -0.684 | 28 | 12  | 5  | 55               |
| L+2       | -0.797 | 6  | 4   | 0  | 90               |
| L+1       | -1.013 | 3  | 90  | 3  | 4                |
| LUMO      | -1.611 | 3  | 93  | 1  | 3                |
| HOMO      | -4.630 | 8  | 6   | 83 | 3                |
| H-1       | -5.462 | 31 | 61  | 7  | 1                |
| H-2       | -5.772 | 63 | 2   | 30 | 6                |
| H-3       | -5.895 | 10 | 42  | 45 | 3                |
| <b>3a</b> |        |    |     |    |                  |
| L+3       | -0.729 | 27 | 11  | 6  | 56               |
| L+2       | -0.842 | 7  | 4   | 1  | 88               |
| L+1       | -1.041 | 3  | 90  | 3  | 4                |
| LUMO      | -1.640 | 3  | 93  | 1  | 3                |
| HOMO      | -4.878 | 10 | 6   | 81 | 3                |
| H-1       | -5.495 | 31 | 61  | 7  | 1                |
| H-2       | -5.711 | 22 | 14  | 61 | 4                |
| H-3       | -5.927 | 50 | 28  | 17 | 4                |

|           | E (eV) | Pt | ppy | SR | PPh <sub>3</sub> |
|-----------|--------|----|-----|----|------------------|
| <b>1b</b> |        |    |     |    |                  |
| L+3       | -0.770 | 27 | 13  | 5  | 55               |
| L+2       | -0.848 | 2  | 71  | 2  | 26               |
| L+1       | -0.901 | 8  | 15  | 0  | 77               |
| LUMO      | -1.552 | 5  | 87  | 2  | 6                |
| HOMO      | -4.418 | 7  | 7   | 82 | 3                |
| H-1       | -5.563 | 23 | 33  | 42 | 2                |
| H-2       | -5.773 | 25 | 49  | 25 | 2                |
| H-3       | -6.025 | 37 | 2   | 57 | 3                |
| <b>2b</b> |        |    |     |    |                  |
| L+3       | -0.797 | 27 | 14  | 5  | 53               |
| L+2       | -0.890 | 2  | 68  | 1  | 29               |
| L+1       | -0.938 | 7  | 15  | 1  | 78               |
| LUMO      | -1.593 | 5  | 87  | 2  | 6                |
| HOMO      | -4.592 | 7  | 6   | 83 | 3                |
| H-1       | -5.676 | 35 | 41  | 23 | 1                |
| H-2       | -5.786 | 12 | 34  | 52 | 2                |
| H-3       | -6.039 | 2  | 13  | 84 | 1                |
| <b>3b</b> |        |    |     |    |                  |
| L+3       | -0.710 | 27 | 10  | 6  | 57               |
| L+2       | -0.815 | 2  | 36  | 1  | 61               |
| L+1       | -0.852 | 7  | 18  | 0  | 75               |
| LUMO      | -1.505 | 5  | 68  | 2  | 26               |
| HOMO      | -4.871 | 9  | 5   | 81 | 4                |
| H-1       | -5.603 | 43 | 34  | 9  | 14               |
| H-2       | -5.698 | 21 | 11  | 63 | 5                |
| H-3       | -5.904 | 52 | 23  | 16 | 9                |

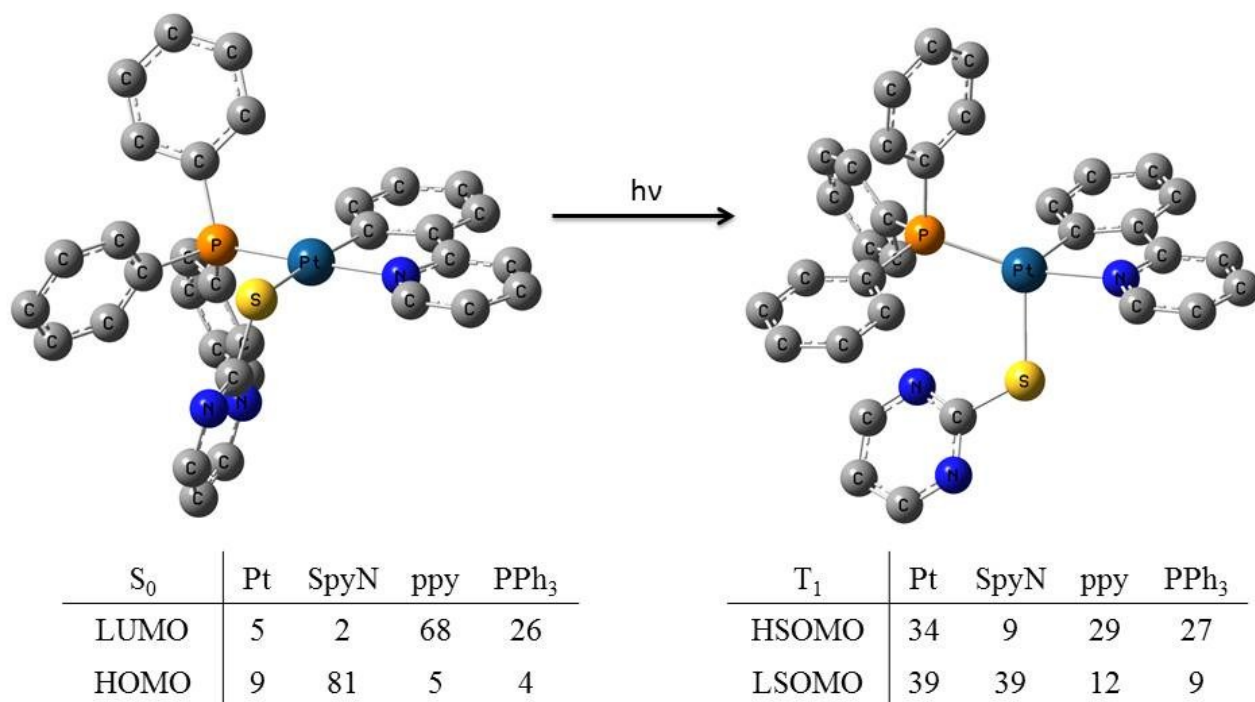

**Figure S13.** DFT optimized  $S_0$  (left) and  $T_1$  (right) geometries of complex **3b** with corresponding contribution of different fragments in frontier molecular orbitals obtained in  $S_0$  and  $T_1$  states.

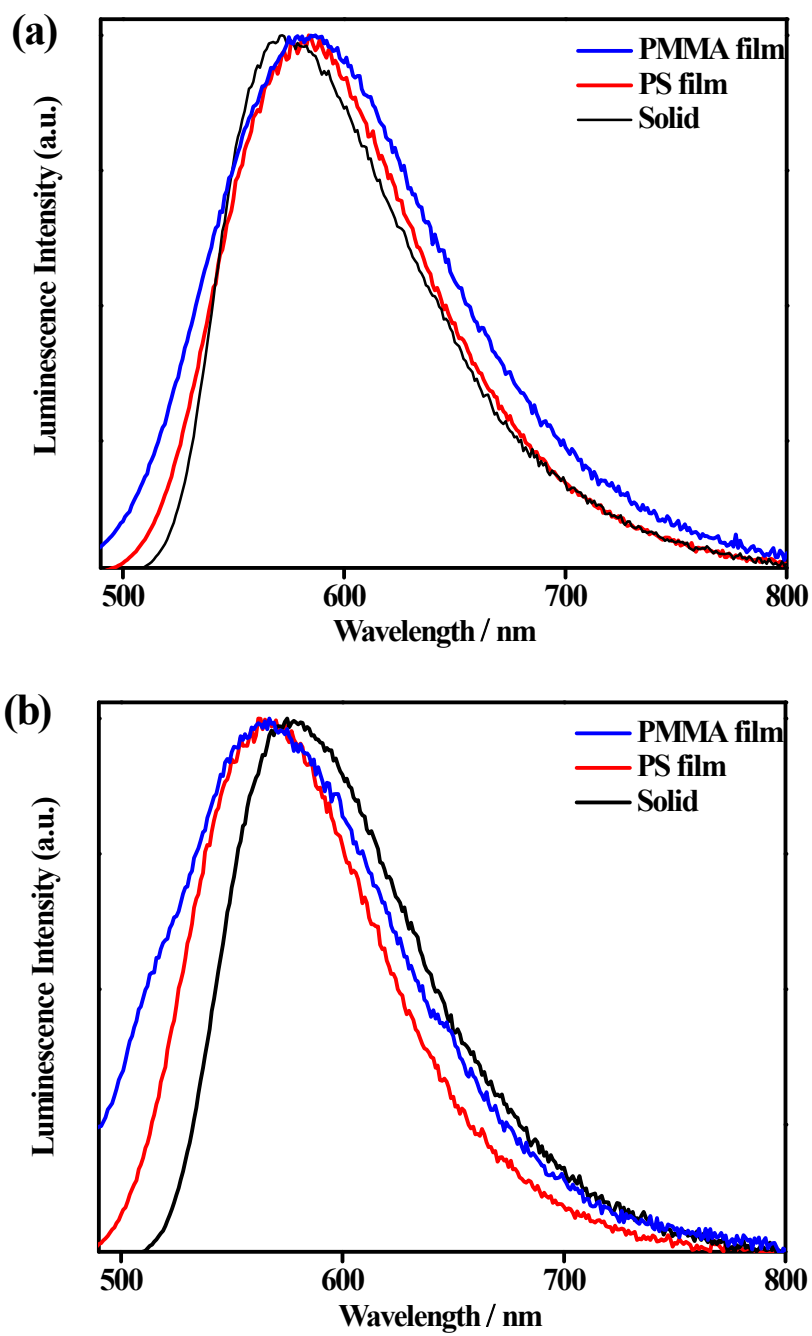

**Figure S14.** Emission spectra of (a) **1a** and (b) **1b** in solid, PMMA and PS films at 298 K.
